# Supplementary material for: Insights into the role of electrostatics in temperature adaptation: a comparative study of psychrophilic, mesophilic, and thermophilic subtilisin-like serine proteases
Source: PubMed Central journal article supplement — RSC Adv. 2018 Aug 22;8(52):29698–713. doi: 10.1039/c8ra05845h (PMC9085296; doi:10.1039/c8ra05845h), 2018-08-22
Supplement: RA-008-C8RA05845H-s001.pdf [file RA-008-C8RA05845H-s001.pdf]

Electronic supplementary information (ESI)

## **Insights into the role of electrostatics in temperature adaptation: A comparative study of psychrophilic, mesophilic, and thermophilic subtilisin-like serine proteases**

Yuan-Ling Xia,<sup>‡a</sup> Jian-Hong Sun,<sup>‡a</sup> Shi-Meng Ai,<sup>b</sup> Yi Li,<sup>a</sup> Xing Du,<sup>a</sup> Peng Sang,<sup>c</sup> Li-Quan Yang,<sup>c</sup> Yun-Xin Fu<sup>\*a,d</sup> and Shu-Qun Liu<sup>\*a,e</sup>

<sup>a</sup>State Key Laboratory for Conservation and Utilization of Bio-Resources in Yunnan, Yunnan University, Kunming, Yunnan, P.R. China

<sup>b</sup>Department of Applied Mathematics, Yunnan Agricultural University, Kunming, Yunnan, P. R. China

<sup>c</sup>College of Agriculture and Biological Science, Dali University, Dali, Yunnan, P. R. China

<sup>d</sup>Human Genetics Center and Division of Biostatistics, School of Public Health, the University of Texas Health Science Center, Houston, Texas, USA

<sup>e</sup>Key Laboratory for Tumor molecular biology of High Education in Yunnan Province, School of Life Sciences, Yunnan University, Kunming, Yunnan, P. R. China

<sup>‡</sup> These authors contributed equally to this work

<sup>\*</sup> Corresponding author

Email: Yunxin.Fu@uth.tmc.edu (YXF), shuqunliu@ynu.edu.com (SQL)

```

PRK      AAQTNAPWGLARISSTSP-GTSTYYYDHSAGQGSCVYVIDTGIEASHPEFEGRAQMVKTYYY---S-SRD 65
AQN      ATQSPAPWGLDRIDQRDLpLSNSYTYT-ATGRGVNVYVIDTGIRTHREFGGRARVGYDALG---GnGQD 66
VPR      --QSNAIWGLDRIDQRNLpLDRNYNAN-FDGFVGTAYVIDTGVNNNHHEEFGGRSVSGYDFVDndaD-SSD 66
PRK_SS   LEELLLLHHHHHHHLLLLL-LLLLEELLLLLLLEEEEEELLLLLLHHHLLLEEEEEELLL---L-LLL
AQN_SS   LEELLLLHHHHHHHLLLLL1LLLLEELL-LLLLLLEEEEEELLLLLLHHHLLLEEEEEELLL---L1LLL
VPR_SS   --LLLLLHHHHHHHLLLLL1LLLLEELL-LLLLLLEEEEEELLLLLLHHHLLLEEEEEELLL1LL-LLL

PRK      GNGHGTHCAGTVGSRTYGVAKKTQLFGVKVLDNNGSGQYSTIIAGMDFVASKNNRNCPKGVVASLSLGG 135
AQN      CNGHGTHVAGTIGGVTYGVAKAVNLYAVRVLDCNGSGSTSGVIAGVDWVTRNHR-----RPVANMSLGG 131
VPR      CNGHGTHVAGTIGGSQYGVAKNVNIVGVRVLSCSGSGTTSVVISGVWVAQNAS-----GPSVANMSLGG 131
PRK_SS   LLLHHHHHHHHHLLLLLLLLLEEEEEELLLLLLHHHLLLEEEEEELLLLLLLLLLEEEEEELLL
AQN_SS   LLLHHHHHHHHHLLLLLLLLLEEEEEELLLLLLHHHLLLEEEEEELLLLLLHHHLLLEEEEEELLL
VPR_SS   LLLHHHHHHHHHLLLLLLLLLEEEEEELLLLLLHHHLLLEEEEEELLLLLLHHHLLLEEEEEELLL

PRK      GYSSSVNSAAARLQSSGMVVAAGNNDARNYSPASEPSVCTVGASDRYDRSSFSNYGSLVDIFGPG 205
AQN      GVSTALDNVAKNSIAAGVVYVAAGNDNANACNYSPARVAEALTVGATTSSDARASFNYGSCVDLFAPG 201
VPR      GQSTALDSAVQGAIQSGVFMLAAGNSADACNTSPARVPSGVTGVTSSDSRSSFNWGSCVDLFAPG 201
PRK_SS   ELLHHHHHHHHHLLLLLEEEEEELLLLLLHHHEELLLLLLLEEEEEELLLLLLLLLLEEEEEEL
AQN_SS   ELLHHHHHHHHHLLLLLEEEEEELLLLLLHHHEELLLLLLLEEEEEELLLLLLLLLLEEEEEEL
VPR_SS   LLLHHHHHHHHHLLLLLEEEEEELLLLLLHHHLLLEEEEEELLLLLLLLLLEEEEEEL

PRK      TDILSTWIG--GSTRSISGTSMATPHVAGLAAYLMTLGK-TTAASACRYIADTANKGDLNIPFGTVNLL 272
AQN      ASIPSAWYtsSTATQTLNGTSMATPHVAGVAALYLEQNPsATPASVASAILNGATTGLSGIGSGSPNRL 271
VPR      SQIKSAWYD--GGYKTISGTSMATPHVAGVAALYQENNgLTPQLTGLLNSRASENKVSDTR-GTTNKL 268
PRK_SS   LLEEEEEEL--LEEEEEELHHHHHHHHHHHHHHHLL-LLLLLHHHHHHHLEELLLLLLLLLLLEE
AQN_SS   LLEEEEEEL11LLEEEEEELHHHHHHHHHHHHHHHLL1LHHHHHHHHHLEELLLLLLLLLLLEE
VPR_SS   LLEEEEEEL--LEEEEEELHHHHHHHHHHHHHHHLL1LHHHHHHHHHLEELLLLLL-LLLLEE

PRK      AYNNYQ-----A 279
AQN      LYSLL----- 276
VPR      LYSLADsgcspdc- 281
PRK_SS   LLLLLL-----L
AQN_SS   LLLLLL-----
VPR_SS   LLLLLL111111-

```

Fig. S1 Structure-based multiple sequence alignment of the psychrophilic VPR, mesophilic PRK, and thermophilic AQN. Protein secondary structure (SS) is shown below the alignment, with H, E, and L/I representing the  $\alpha$ -helix (or 3/10 helix),  $\beta$ -strand, and loop, respectively. Residue insertion and deletion are denoted by lowercase single-letter amino acid code and '-', respectively. The charged residues are highlighted in grey.

Table S1 pK<sub>a</sub> values of histidines in the three protease structures predicted by DelPhiPKa<sup>†</sup>.

| Histidines <sup>a</sup> | VPR  | PRK  | AQN  |
|-------------------------|------|------|------|
| His46                   | 6.15 | 5.78 | 5.08 |
| His69                   | 6.99 | 6.86 | 6.82 |
| His72                   | 6.13 | 6.10 | 5.73 |
| His118                  | -    | -    | 5.50 |
| His229                  | 5.47 | 5.44 | 5.47 |

<sup>†</sup>DelPhiPKa default parameters were used except for the force field and salt concentration, which were set to CHARMM and 100 mM, respectively.

<sup>a</sup>Residue numbering is according to the PRK sequence and structurally equivalent residue positions were determined from structure-based multiple sequence alignment (Fig. S1).

Table S2 Comparison of amino acid composition and numbers of salt bridges and salt-bridge networks among the psychrophilic VPR, mesophilic PRK, and thermophilic AQN.

| Parameter                        | VPR         | PRK         | AQN         |
|----------------------------------|-------------|-------------|-------------|
| PDB ID                           | 1SH7        | 1IC6        | 4DZT        |
| Resolution (Å)                   | 1.84        | 0.98        | 1.95        |
| Residue number                   | 281         | 279         | 276         |
| Charged <sup>a</sup>             | 38 (13.5%)  | 39 (14.0%)  | 33 (12.0%)  |
| Acidic <sup>a</sup>              | 24 (8.5%)   | 19 (6.8%)   | 16 (5.8%)   |
| Basic <sup>a</sup>               | 14 (5.0%)   | 20 (7.2%)   | 17 (6.2%)   |
| Polar uncharged <sup>a</sup>     | 141 (50.2%) | 137 (49.1%) | 126 (45.7%) |
| Hydrophobic <sup>a</sup>         | 98 (34.9%)  | 99 (35.5%)  | 112 (40.6%) |
| Aromatic <sup>a</sup>            | 19 (6.8%)   | 25 (9.0%)   | 18 (6.5%)   |
| Salt bridge <sup>b</sup>         | 7 (36.8%)   | 8 (41.0%)   | 6 (36.4%)   |
| Salt-bridge network <sup>b</sup> | 1 (7.9%)    | 1 (7.7%)    | 0           |

<sup>a</sup>Numbers and percentages (in parentheses) of charged (Asp, Glu, Lys, and Arg), acidic (Asp and Glu), basic (Lys and Arg), polar uncharged (Gly, Ser, Thr, Asn, Gln, Tyr, Cys, and His), hydrophobic (Leu, Ile, Met, Val, Trp, Pro, Ala, and Phe), and aromatic (Phe, Tyr, and Trp) residues in protease sequences.

<sup>b</sup>Numbers of salt bridges and salt-bridge networks in crystal structures. Percentages shown in parentheses are proportion of the charged residues forming salt bridges/salt-bridge networks out of the total number of charged residues. A salt bridge is considered to exist if at least a pair of nitrogen and oxygen atoms in side-chain charged groups of two charged residues is within a 4-Å distance; a salt-bridge network is considered to exist if more than three residues participate in the formation of at least two salt bridges.

Table S3 Salt bridges identified in the crystal structures of the psychrophilic VPR, mesophilic RPK, and thermophilic AQN.

|                                    | VPR <sup>a</sup>   | PRK <sup>a</sup>    | AQN <sup>a</sup> |
|------------------------------------|--------------------|---------------------|------------------|
| Common to all <sup>b</sup>         | Arg12-Asp187       | <u>Arg12-Asp187</u> | Arg12-Asp187     |
| Common to VPR and AQN <sup>c</sup> | <u>Asp58-Arg94</u> |                     | Asp58-Arg94      |
|                                    | Asp142-Arg173      |                     | Asp142-Arg173    |
| Unique <sup>d</sup>                | Arg16-Asp278       | <u>Arg12-Asp260</u> | Asp17-Arg260     |
|                                    | <u>Asp61-Arg94</u> | Glu48-Arg80         | Arg31-Glu239     |
|                                    | Arg189-Asp263      | Glu50-Arg52         | Arg43-Asp214b    |
|                                    | Glu240-Arg255      | Lys94-Asp98         |                  |
|                                    |                    | Asp112-Arg147       |                  |
|                                    |                    | Asp117-Arg121       |                  |
|                                    |                    | Asp184-Arg188       |                  |

<sup>a</sup>Salt bridges are indicated as their constituent residues and residue numbers. Residue numbering is according to the PRK sequence and structurally equivalent residue positions were determined from structure-based multiple sequence alignment (Fig. S1). Salt bridges highlighted by underline participate in the formation of a salt-bridge network.

<sup>b</sup>Salt bridges observed in all three crystal structures (absolutely conserved).

<sup>c</sup>Salt bridges observed in the crystal structures of VPR and AQN (relatively conserved).

<sup>d</sup>Salt bridges unique to the respective crystal structures (non-conserved).

Table S4 Relative solvent-accessible surface area (R-SASA) and average energy values of individual salt-bridge networks during MD simulations of VPR, PRK, and AQN at the three simulation temperatures.

| Salt-bridge network <sup>a</sup> | Prot & Temp <sup>b</sup><br>(K) | R-SASA <sup>c</sup><br>(%) | $\Delta\Delta G_{\text{dolv-ntwk}}^{\text{d}}$<br>(kcal/mol) | $\Delta\Delta G_{\text{brd-ntwk}}^{\text{e}}$<br>(kcal/mol) | $\Delta\Delta G_{\text{prt-ntwk}}^{\text{f}}$<br>(kcal/mol) | $\Delta\Delta G_{\text{tot-ntwk}}^{\text{g}}$<br>(kcal/mol) |
|----------------------------------|---------------------------------|----------------------------|--------------------------------------------------------------|-------------------------------------------------------------|-------------------------------------------------------------|-------------------------------------------------------------|
| Asp58-Arg94-Asp61(c)             | VPR 283                         | 21.0                       | 21.2 (1.0)                                                   | -6.5 (1.4)                                                  | -33.8 (4.2)                                                 | -19.2 (3.4)                                                 |
| Asp58-Arg94-Asp61(c)             | VPR 300                         | 20.3                       | 22.7 (1.6)                                                   | -6.7 (1.1)                                                  | -38.1 (2.8)                                                 | -22.2 (2.2)                                                 |
| Asp58-Arg94-Asp61(c)             | VPR 343                         | 21.7                       | 25.4 (1.7)                                                   | -9.2 (2.5)                                                  | -40.6 (5.8)                                                 | -24.4 (4.5)                                                 |
| Arg189-Asp263-Arg265             | VPR 283                         | 43.3                       | 10.1 (2.3)                                                   | -2.2 (2.9)                                                  | -11.9 (2.5)                                                 | -4.0 (1.9)                                                  |
| Arg189-Asp263-Arg265             | VPR 300                         | 37.4                       | 13.6 (2.3)                                                   | -6.3 (3.2)                                                  | -11.6 (1.8)                                                 | -4.4 (1.4)                                                  |
| Arg189-Asp263-Arg265             | VPR 343                         | 36.5                       | 16.4 (2.3)                                                   | -9.2 (3.2)                                                  | -13.0 (2.1)                                                 | -5.7 (1.8)                                                  |
| Arg52-Glu50-Lys87                | PRK 283                         | 35.1                       | 12.1 (2.4)                                                   | -6.4 (2.9)                                                  | -9.6 (1.1)                                                  | -3.9 (1.4)                                                  |
| Arg52-Glu50-Lys87                | PRK 300                         | 34.1                       | 13.4 (2.9)                                                   | -7.6 (3.6)                                                  | -10.4 (1.4)                                                 | -4.6 (1.6)                                                  |
| Arg52-Glu50-Lys87                | PRK 343                         | 33.1                       | 16.3 (3.2)                                                   | -10.0 (4.2)                                                 | -12.7 (1.7)                                                 | -6.4 (2.0)                                                  |
| Asp65-Lys94-Asp98                | PRK 283                         | 12.6                       | 30.1 (1.8)                                                   | -10.8 (1.9)                                                 | -47.8 (2.5)                                                 | -28.5 (2.3)                                                 |
| Asp65-Lys94-Asp98                | PRK 300                         | 21.6                       | 24.1 (5.8)                                                   | -9.6 (5.8)                                                  | -29.5 (7.5)                                                 | -15.0 (5.9)                                                 |
| Asp65-Lys94-Asp98                | PRK 343                         | 15.4                       | 33.4 (4.1)                                                   | -12.3 (3.8)                                                 | -51.5 (8.0)                                                 | -30.4 (6.0)                                                 |
| Asp187-Arg12-Asp260(c)           | PRK 283                         | 19.6                       | 19.4 (2.0)                                                   | -7.3 (1.3)                                                  | -29.7 (2.4)                                                 | -17.5 (2.3)                                                 |
| Asp187-Arg12-Asp260(c)           | PRK 300                         | 20.8                       | 19.3 (2.0)                                                   | -7.4 (1.4)                                                  | -30.2 (2.4)                                                 | -18.4 (2.1)                                                 |
| Asp187-Arg12-Asp260(c)           | PRK 343                         | 19.8                       | 23.1 (2.9)                                                   | -9.1 (1.7)                                                  | -37.5 (3.3)                                                 | -23.5 (2.5)                                                 |
| Arg43-Asp214b-Arg47              | AQN 283                         | 44.1                       | 10.7 (2.0)                                                   | -6.7 (2.4)                                                  | -4.6 (1.5)                                                  | -0.6 (1.4)                                                  |
| Arg43-Asp214b-Arg47              | AQN 300                         | 48.9                       | 9.6 (3.1)                                                    | -5.7 (3.7)                                                  | -4.2 (1.6)                                                  | -0.2 (2.0)                                                  |
| Arg43-Asp214b-Arg47              | AQN 343                         | 50.4                       | 9.1 (3.3)                                                    | -4.0 (3.8)                                                  | -5.5 (2.7)                                                  | -0.4 (2.5)                                                  |
| Asp58-Arg94-Asp97                | AQN 283                         | 12.7                       | 21.5 (4.1)                                                   | -7.5 (2.5)                                                  | -28.4 (6.2)                                                 | -14.5 (4.1)                                                 |
| Asp58-Arg94-Asp97                | AQN 300                         | 17.2                       | 23.8 (2.2)                                                   | -9.0 (1.0)                                                  | -29.5 (6.6)                                                 | -14.7 (4.6)                                                 |
| Asp58-Arg94-Asp97                | AQN 343                         | 18.6                       | 25.8 (2.7)                                                   | -10.9 (1.9)                                                 | -29.8 (7.3)                                                 | -15.0 (5.0)                                                 |

<sup>a</sup>Crystal salt-bridge networks retained during MD simulations are followed by 'c' in parentheses.

<sup>b</sup>Protein and MD simulation temperature.

<sup>c</sup>R-SASA was calculated as the average of relative solvent-accessible surface areas of the network-participating residues.

<sup>d-g</sup>Average values of the desolvation energy penalty, bridge energy term, protein energy term, and total electrostatic free energy (or electrostatic strength) of a salt-bridge network, respectively. SD is in parentheses.

Table S5 Average values of solvent-accessible surface area (SASA) and energy terms of individual calcium ions during MD simulations of VPR, PRK, and AQN at the three simulation temperatures.

| No. | Prot & Temp <sup>a</sup> | Ca <sup>2+</sup> -binding site | SASA (Å <sup>2</sup> ) | $\Delta\Delta G_{\text{dsiv-ca}}^{\text{b}}$ (kcal/mol) | $\Delta\Delta G_{\text{prt-ca}}^{\text{c}}$ (kcal/mol) | $\Delta\Delta G_{\text{tot-ca}}^{\text{d}}$ (kcal/mol) |
|-----|--------------------------|--------------------------------|------------------------|---------------------------------------------------------|--------------------------------------------------------|--------------------------------------------------------|
| Ca1 | VPR 283                  | P175, G177, D200               | 10.5 (3.8)             | 28.6 (3.2)                                              | -32.7 (3.5)                                            | -4.1 (1.9)                                             |
| Ca1 | VPR 300                  | P175, G177, D200               | 10.8 (4.1)             | 30.1 (3.5)                                              | -35.5 (3.8)                                            | -5.4 (2.1)                                             |
| Ca1 | VPR 343                  | P175, G177, D200               | 14.2 (8.3)             | 32.3 (7.2)                                              | -39.6 (7.8)                                            | -7.3 (2.6)                                             |
| Ca2 | VPR 283                  | D58, D61b, D62                 | 4.9 (3.3)              | 42.4 (2.9)                                              | -68.5 (5.2)                                            | -26.1 (3.1)                                            |
| Ca2 | VPR 300                  | D58, D61b, D62                 | 3.7 (2.6)              | 45.9 (2.2)                                              | -74.5 (4.3)                                            | -28.6 (3.3)                                            |
| Ca2 | VPR 343                  | D58, D61b, D62                 | 4.7 (3.7)              | 51.6 (4.8)                                              | -85.6 (8.4)                                            | -34.1 (4.5)                                            |
| Ca3 | VPR 283                  | D11, D14, Q15, D20,            | 0.2 (0.8)              | 59.6 (5.3)                                              | -91.4 (9.1)                                            | -31.8 (4.6)                                            |
| Ca3 | VPR 300                  | D11, D14, Q15, D20,            | 0.2 (0.9)              | 64.7 (6.0)                                              | -100.8 (9.5)                                           | -36.1 (4.7)                                            |
| Ca3 | VPR 343                  | D11, D14, Q15, D20,            | 0.5 (1.4)              | 72.8 (8.3)                                              | -118.1                                                 | -45.3 (5.9)                                            |
| Ca1 | PRK 283                  | P175, V177, D200               | 11.2 (3.5)             | 31.9 (2.0)                                              | -35.8 (2.6)                                            | -3.9 (1.7)                                             |
| Ca1 | PRK 300                  | P175, V177, D200               | 14.6 (8.2)             | 30.3 (6.9)                                              | -34.9 (7.0)                                            | -4.6 (1.9)                                             |
| Ca1 | PRK 343                  | P175, V177, D200               | 12.4 (7.7)             | 37.9 (6.8)                                              | -45.2 (7.4)                                            | -7.4 (2.3)                                             |
| Ca2 | PRK 283                  | T16, D260                      | 33.5 (4.5)             | 19.5 (1.5)                                              | -27.1 (2.0)                                            | -7.6 (1.3)                                             |
| Ca2 | PRK 300                  | T16, D260                      | 35.7 (4.9)             | 19.6 (1.9)                                              | -27.8 (2.1)                                            | -8.2 (1.3)                                             |
| Ca2 | PRK 343                  | T16, D260                      | 36.3 (5.0)             | 22.6 (2.1)                                              | -34.0 (2.6)                                            | -11.4 (1.7)                                            |
| Ca1 | AQN 283                  | D11, D14, Q15, S20, S22        | 1.3 (1.9)              | 54.4 (3.0)                                              | -73.0 (4.1)                                            | -18.5 (2.8)                                            |
| Ca1 | AQN 300                  | D11, D14, Q15, S20, S22        | 2.1 (2.3)              | 56.3 (4.5)                                              | -77.0 (5.7)                                            | -20.7 (3.3)                                            |
| Ca1 | AQN 343                  | D11, D14, Q15, S20, S22        | 2.5 (3.0)              | 63.2 (6.4)                                              | -90.7 (8.4)                                            | -27.4 (4.6)                                            |
| Ca2 | AQN 283                  | V174, A177, T179, D200         | 13.4 (5.5)             | 25.0 (3.1)                                              | -29.6 (3.9)                                            | -4.6 (2.1)                                             |
| Ca2 | AQN 300                  | V174, A177, T179, D200         | 12.5 (3.9)             | 28.0 (2.3)                                              | -34.2 (2.9)                                            | -6.3 (1.9)                                             |
| Ca2 | AQN 343                  | V174, A177, T179, D200         | 13.8 (5.1)             | 31.7 (3.6)                                              | -39.5 (5.5)                                            | -7.7 (3.3)                                             |

<sup>a</sup>Protein and simulation temperature

<sup>b-d</sup>Average values of the desolvation energy penalty, protein energy term, and total electrostatic free energy (or electrostatic strength) of a calcium ion, respectively. SD is in parentheses.

Table S6 Comparison of electrostatic free energy contributions to protein stability by different types of electrostatic interactions among VPR, PRK, and AQN at the three simulation temperatures.

| Prot & Temp <sup>a</sup><br>(K) | Salt bridge      |                                    |                                  | Salt-bridge network |                                    |                                  | Calcium ion      |                                    |                                  |
|---------------------------------|------------------|------------------------------------|----------------------------------|---------------------|------------------------------------|----------------------------------|------------------|------------------------------------|----------------------------------|
|                                 | No. <sup>b</sup> | Average <sup>c</sup><br>(kcal/mol) | Total <sup>d</sup><br>(kcal/mol) | No. <sup>b</sup>    | Average <sup>c</sup><br>(kcal/mol) | Total <sup>d</sup><br>(kcal/mol) | No. <sup>b</sup> | Average <sup>c</sup><br>(kcal/mol) | Total <sup>d</sup><br>(kcal/mol) |
| VPR 283                         | 9                | -3.0 (3.7)                         | -27.0                            | 2                   | -11.6 (7.6)                        | -23.2                            | 3                | -20.7 (11.9)                       | -62.0                            |
| VPR 300                         | 9                | -3.8 (3.9)                         | -34.2                            | 2                   | -13.3 (8.9)                        | -26.6                            | 3                | -23.4 (13.1)                       | -70.1                            |
| VPR 343                         | 10               | -4.7 (4.2)                         | -47.0                            | 2                   | -15.1 (9.4)                        | -30.1                            | 3                | -28.9 (15.9)                       | -86.7                            |
| PRK 283                         | 12               | -3.2 (2.7)                         | -38.4                            | 3                   | -16.6 (10.1)                       | -49.9                            | 2                | -5.8 (1.9)                         | -11.5                            |
| PRK 300                         | 14               | -3.9 (4.4)                         | -54.6                            | 3                   | -12.8 (5.9)                        | -38.5                            | 2                | -6.4 (1.8)                         | -12.8                            |
| PRK 343                         | 12               | -4.6 (3.7)                         | -55.5                            | 3                   | -20.1 (10.1)                       | -60.3                            | 2                | -9.4 (2.0)                         | -19.8                            |
| AQN 283                         | 8                | -2.8 (3.0)                         | -22.4                            | 2                   | -7.6 (7.0)                         | -15.1                            | 2                | -11.6 (7.0)                        | -23.1                            |
| AQN 300                         | 9                | -3.4 (3.5)                         | -30.6                            | 2                   | -7.5 (7.3)                         | -14.9                            | 2                | -13.5 (7.2)                        | -27.0                            |
| AQN 343                         | 10               | -4.2 (3.4)                         | -42.0                            | 2                   | -7.7 (7.3)                         | -15.4                            | 2                | -17.6 (9.9)                        | -35.1                            |

<sup>a</sup>Protein and simulation temperature.

<sup>b</sup>Number of salt bridges, salt-bridge networks, or calcium ions.

<sup>c</sup>Average value of electrostatic free energy contribution (or electrostatic strength). SD is in parentheses.

<sup>d</sup>Total value (or cumulative sum) of electrostatic free energy contribution.



Table S7 Comparison of flexibility of structural regions of interest among VPR, PRK and AQN.

| Structural region            | C <sub>α</sub> RMSF of VPR <sup>a</sup> (Å) |             |             | C <sub>α</sub> RMSF of PRK <sup>a</sup> (Å) |             |             | C <sub>α</sub> RMSF of AQN <sup>a</sup> (Å) |             |             |
|------------------------------|---------------------------------------------|-------------|-------------|---------------------------------------------|-------------|-------------|---------------------------------------------|-------------|-------------|
|                              | 283 K                                       | 300 K       | 343 K       | 283 K                                       | 300 K       | 343 K       | 283 K                                       | 300 K       | 343 K       |
| All <sup>b</sup>             | 0.70 (0.70)                                 | 0.77 (0.82) | 0.97 (1.04) | 0.52 (0.29)                                 | 0.61 (0.37) | 0.68 (0.36) | 0.51 (0.29)                                 | 0.56 (0.36) | 0.64 (0.42) |
| Catalytic triad <sup>c</sup> | 0.50 (0.03)                                 | 0.53 (0.10) | 0.65 (0.13) | 0.42 (0.03)                                 | 0.51 (0.12) | 0.55 (0.11) | 0.49 (0.05)                                 | 0.43 (0.11) | 0.52 (0.11) |
| S1 site <sup>d</sup>         | 0.72 (0.43)                                 | 0.74 (0.41) | 0.84 (0.39) | 0.60 (0.34)                                 | 0.67 (0.36) | 0.76 (0.40) | 0.55 (0.18)                                 | 0.64 (0.31) | 0.68 (0.39) |
| S2 site <sup>e</sup>         | 0.88 (0.63)                                 | 1.10 (0.98) | 1.26 (1.02) | 0.80 (0.79)                                 | 0.85 (0.46) | 0.78 (0.39) | 0.73 (0.47)                                 | 0.92 (0.83) | 1.11 (0.98) |
| S2-loop <sup>f</sup>         | 1.15 (0.57)                                 | 1.58 (0.92) | 1.68 (0.96) | 1.11 (0.71)                                 | 1.17 (0.49) | 0.98 (0.37) | 1.13 (0.49)                                 | 1.31 (0.76) | 1.54 (0.91) |
| PSL <sup>g</sup>             | 0.68 (0.12)                                 | 0.81 (0.14) | 0.95 (0.14) | 0.58 (0.09)                                 | 1.02 (0.28) | 0.89 (0.16) | 0.83 (0.30)                                 | 0.82 (0.17) | 0.98 (0.18) |

<sup>a</sup>C<sub>α</sub> root mean square fluctuation (RMSF) value of each residue was calculated over the concatenated equilibrium MD trajectories of the three proteases at the three simulation temperatures, and then was averaged over the residues in the structural region of interest (SD is in parentheses).

<sup>b</sup>All residues.

<sup>c</sup>Residues D39, H69 and S224.

<sup>d</sup>Residues 132-135, 158-161, 162, 169, and 222-225.

<sup>e</sup>Residues 39, 40, 67, 69, 96, 100.

<sup>f</sup>Residues 95-101.

<sup>g</sup>Surface polar loop (PSL) is composed of residues 58-68.
